# Supplementary material for: Hypergraph-based connectivity measures for signaling pathway topologies
Source: PubMed Central journal article supplement (PMC6834280; doi:10.1371/journal.pcbi.1007384), 2019-10-25

# A Hypergraph B-Relaxation Distance

Unfiltered

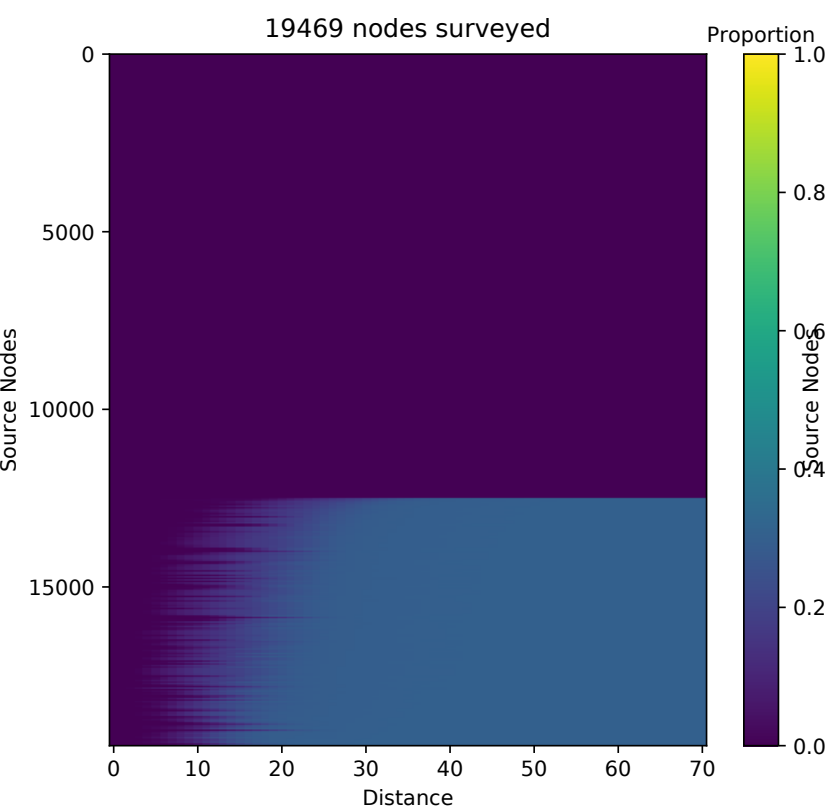

Blacklisted Nodes Removed

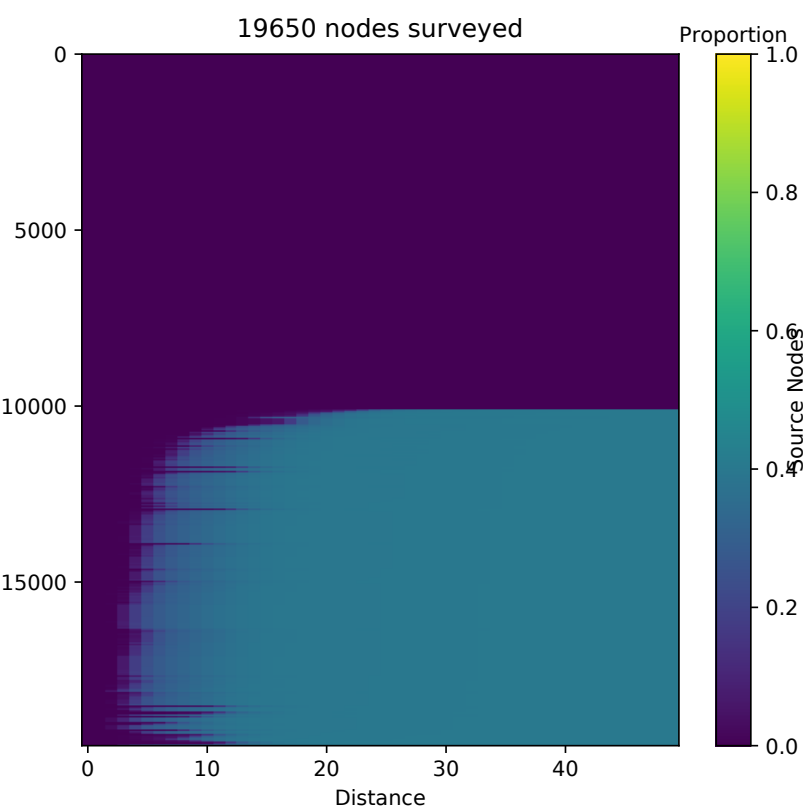

Small Molecules Removed

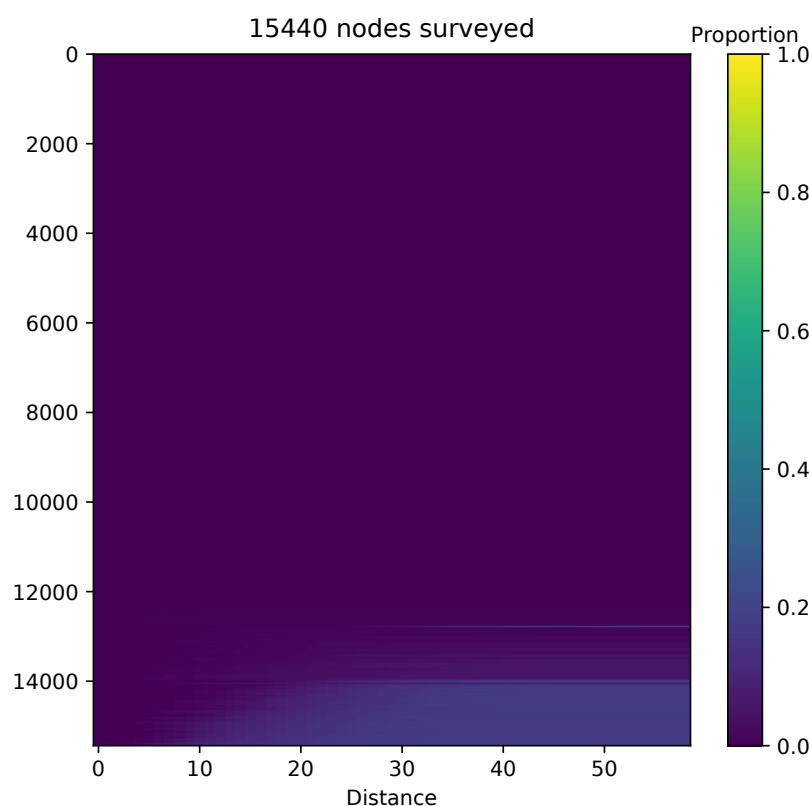

# B Established Connectivity Measures (Blacklisted Nodes Removed)

Directed Graph

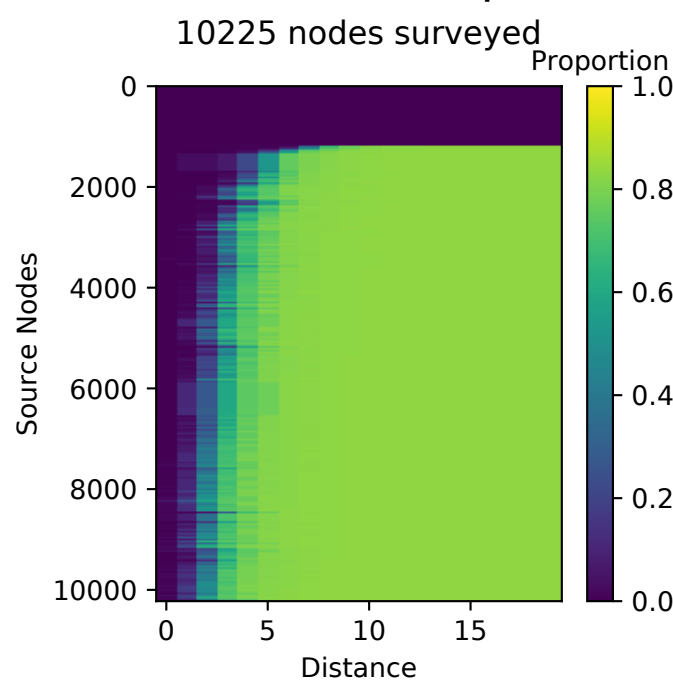

Bipartite Graph

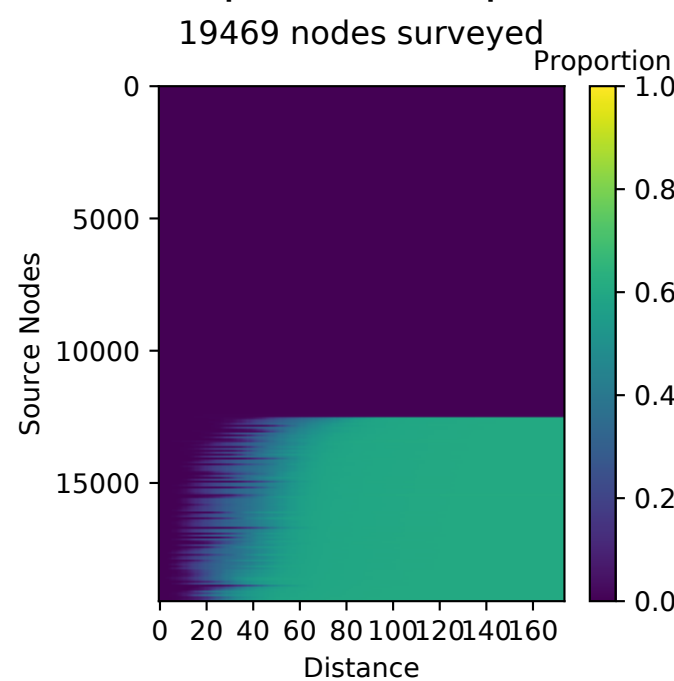

Hypergraph (B-Conn.)

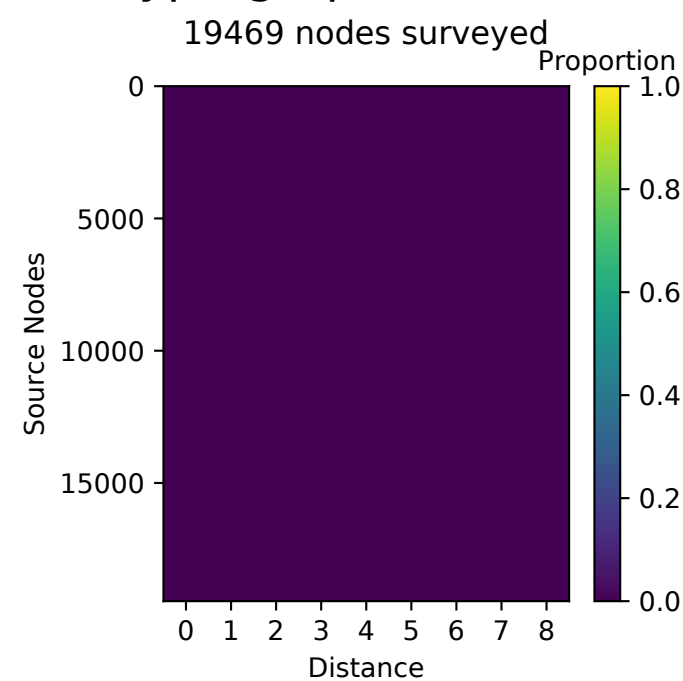

# C Established Connectivity Measures (Small Molecules Removed)

Directed Graph

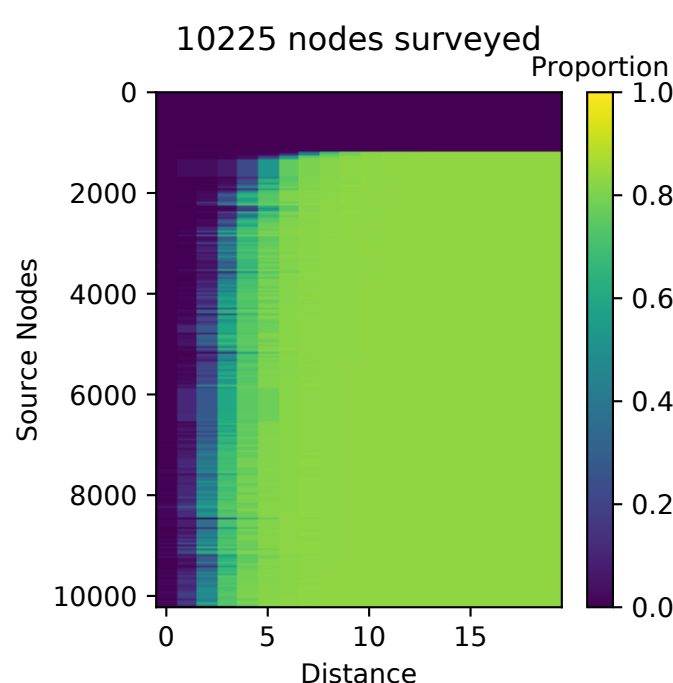

Bipartite Graph

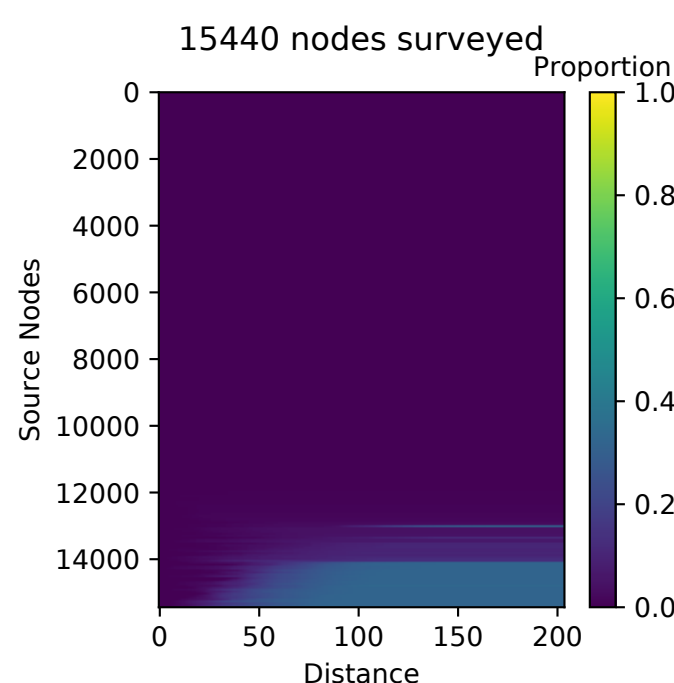

Hypergraph (B-Conn.)

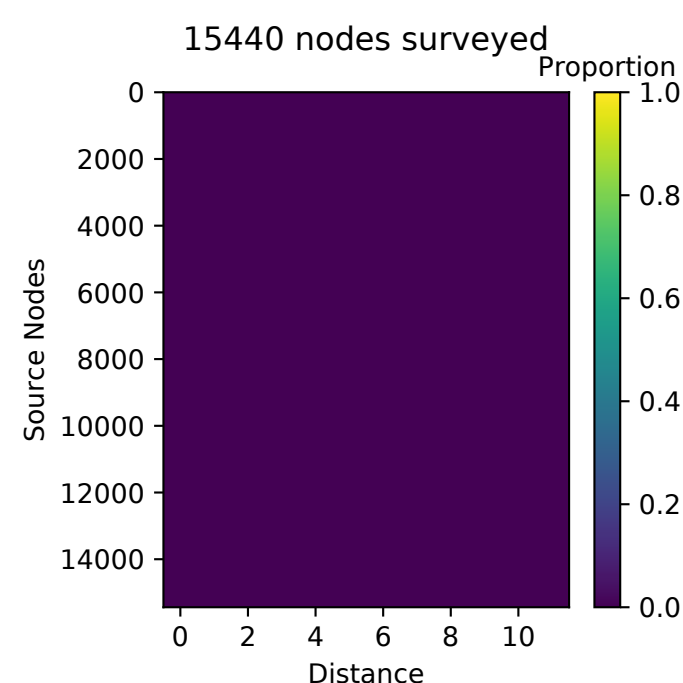

Supplement: pcbi.1007384.s001.pdf [file pcbi.1007384.s001.pdf]
