# Supplementary material for: Hypergraph-based connectivity measures for signaling pathway topologies
Source: PubMed Central journal article supplement (PMC6834280; doi:10.1371/journal.pcbi.1007384), 2019-10-25
Supplement: pcbi.1007384.s002.pdf [file pcbi.1007384.s002.pdf]

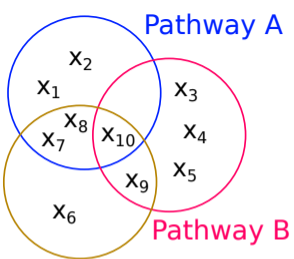

Pathway C

|   | A | B | C |
|---|---|---|---|
| A | 5 | 1 | 3 |
| B | 1 | 5 | 2 |
| C | 3 | 2 | 5 |

$n=10$

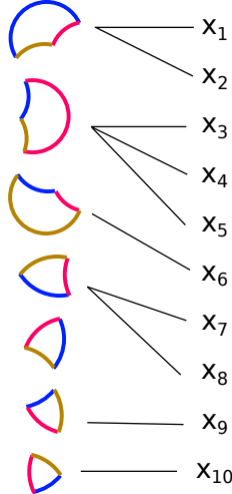

→ Degree-preserving  
edge swaps  
( $m=4$ )

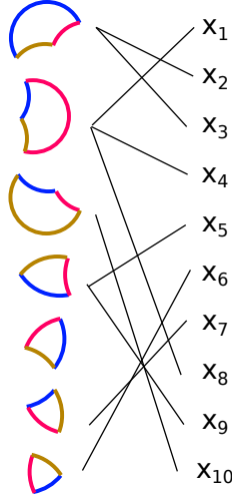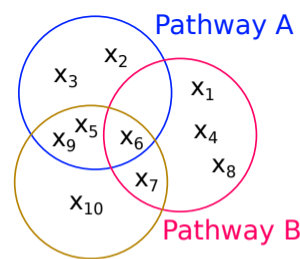

Pathway C

|   | A | B | C |
|---|---|---|---|
| A | 5 | 1 | 3 |
| B | 1 | 5 | 2 |
| C | 3 | 2 | 5 |

$n=10$
