# Supplementary material for: Hypergraph-based connectivity measures for signaling pathway topologies
Source: PubMed Central journal article supplement (PMC6834280; doi:10.1371/journal.pcbi.1007384), 2019-10-25

# Hypergraph (B-Relaxation Distance) Influence Scores

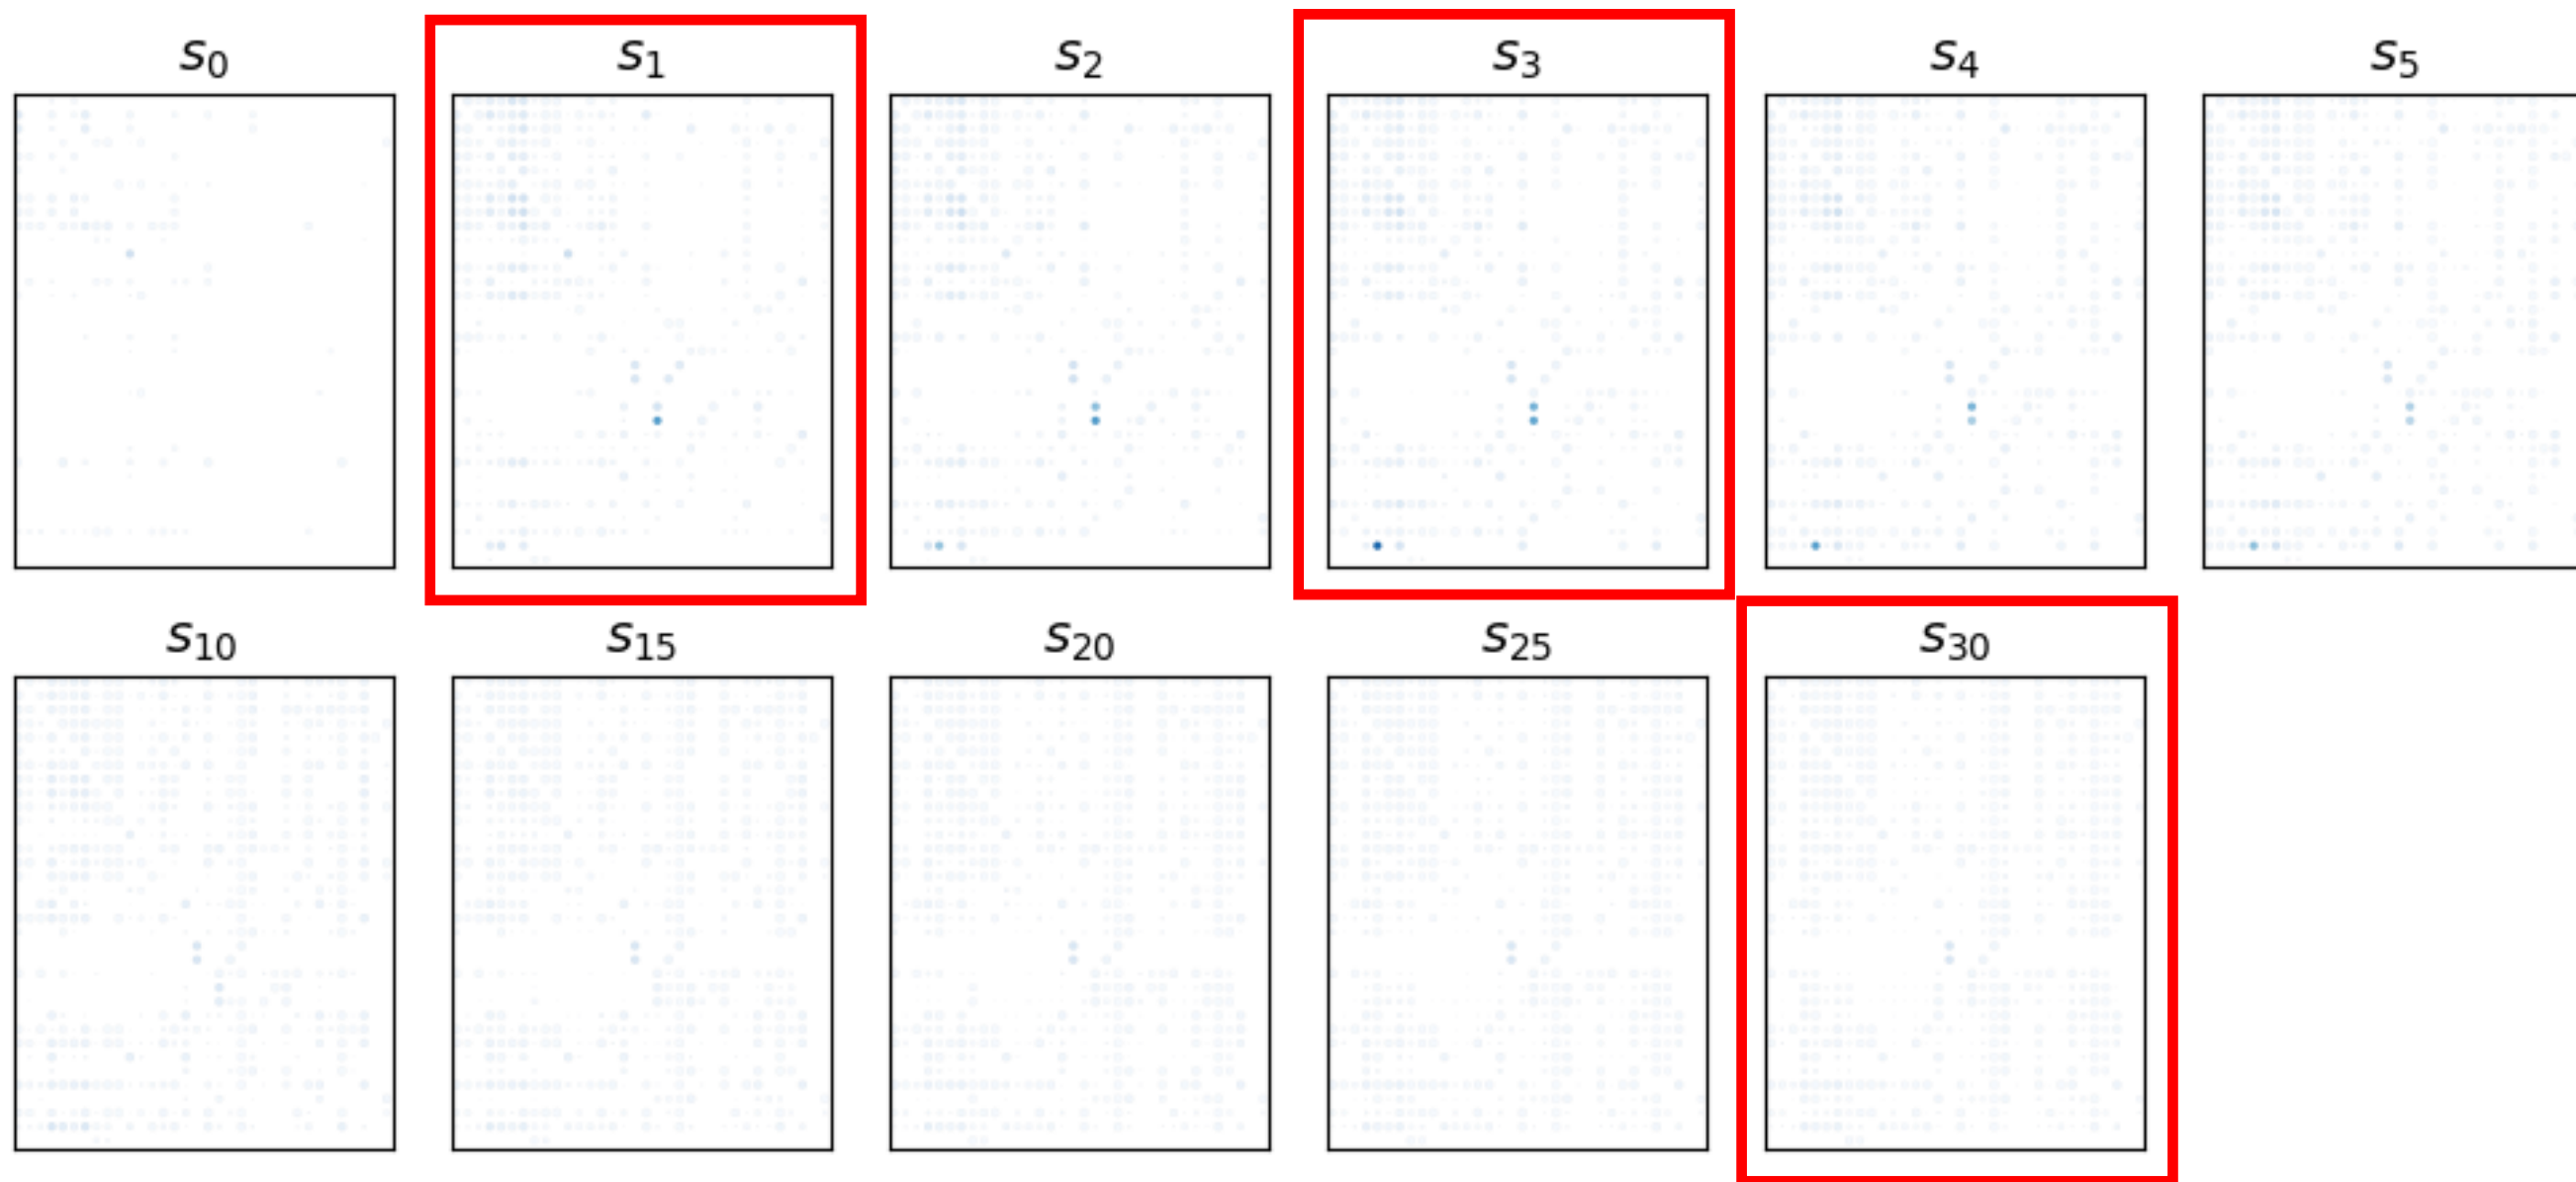

Influence Score  $s_1$

Influence Score  $s_3$

Influence Score  $s_{30}$

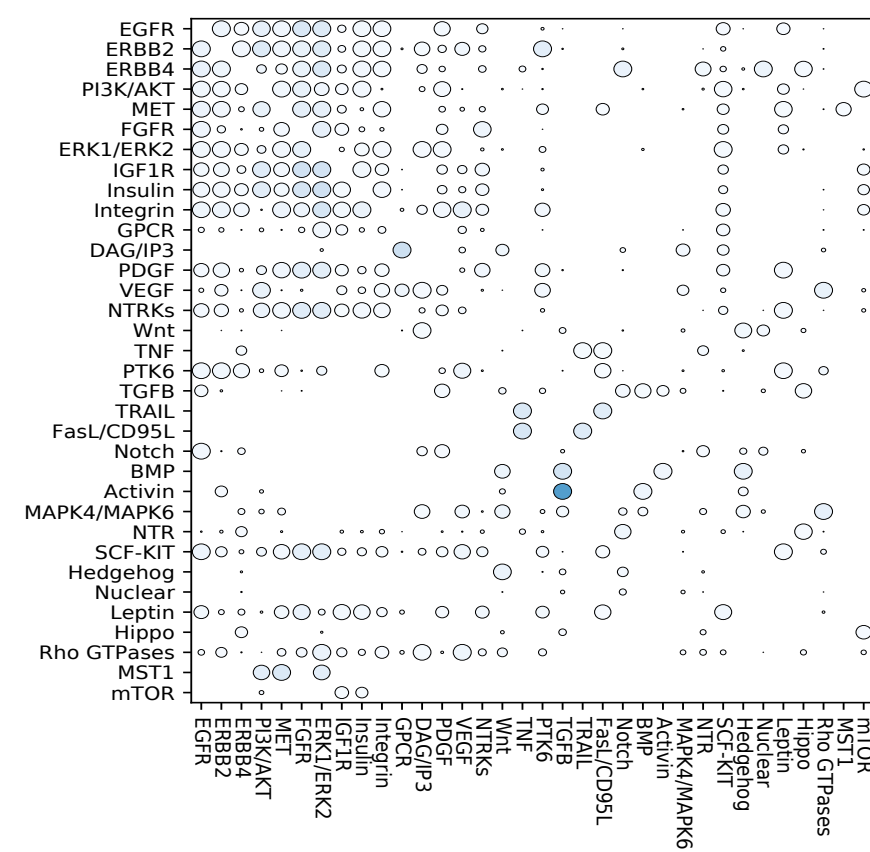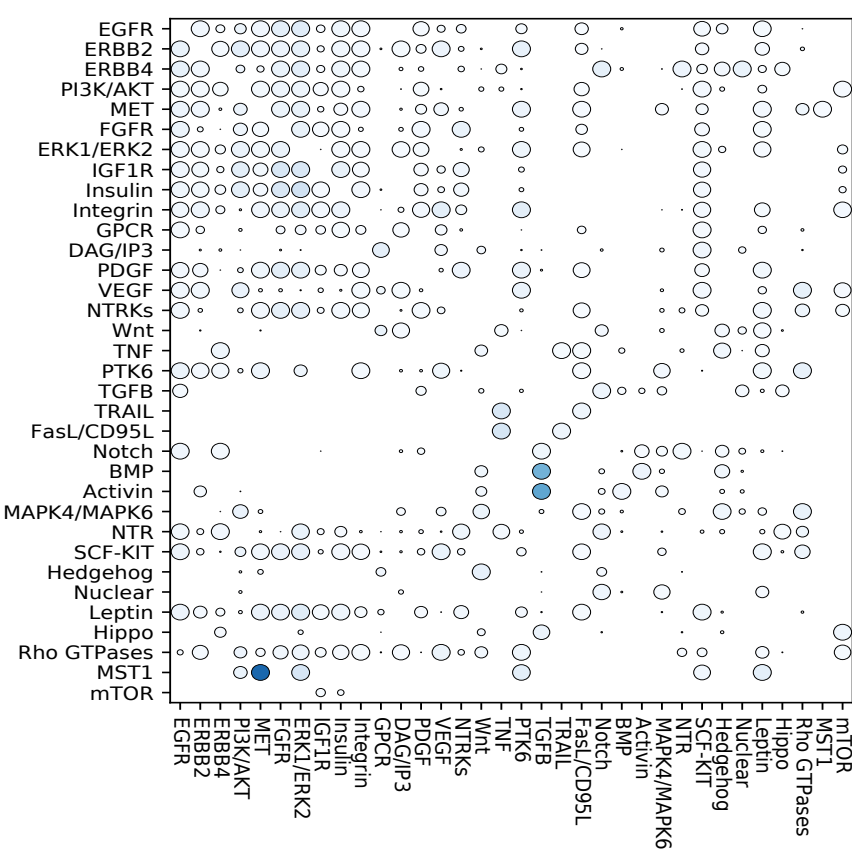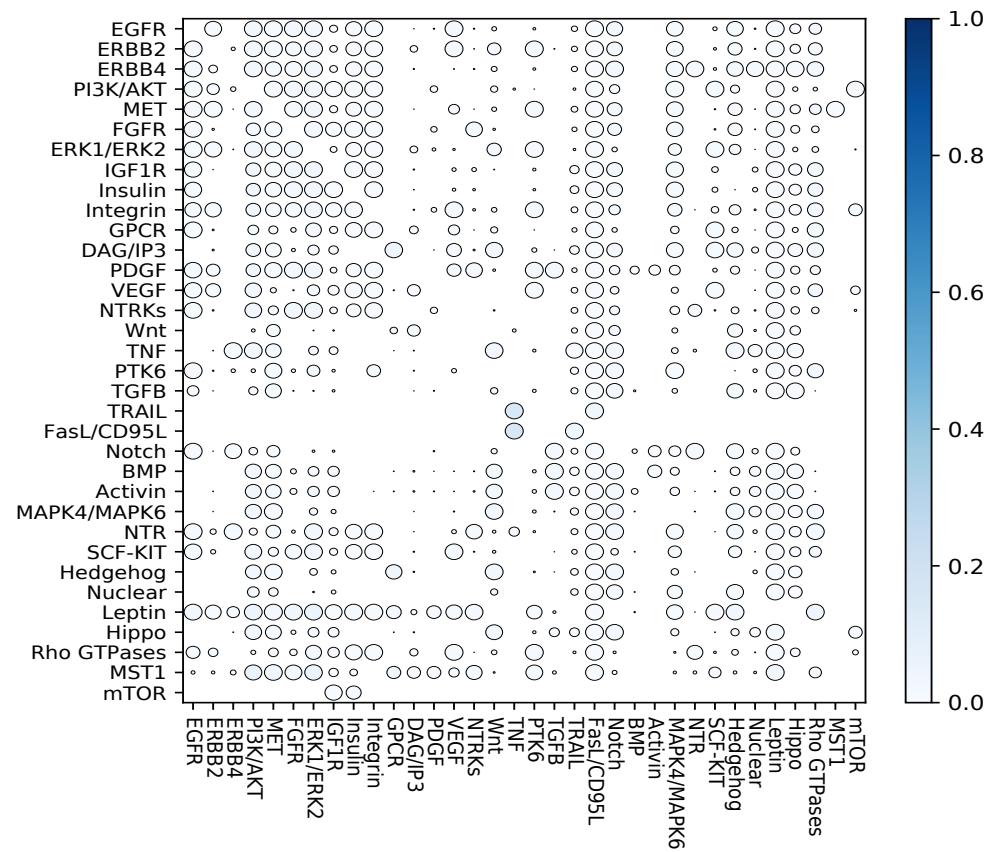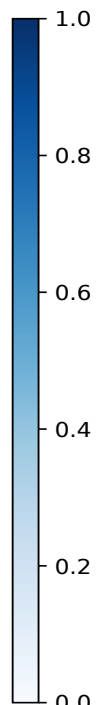

Supplement: pcbi.1007384.s003.pdf [file pcbi.1007384.s003.pdf]
