# Supplementary material for: Hypergraph-based connectivity measures for signaling pathway topologies
Source: PubMed Central journal article supplement (PMC6834280; doi:10.1371/journal.pcbi.1007384), 2019-10-25

# Directed Graph Influence Scores

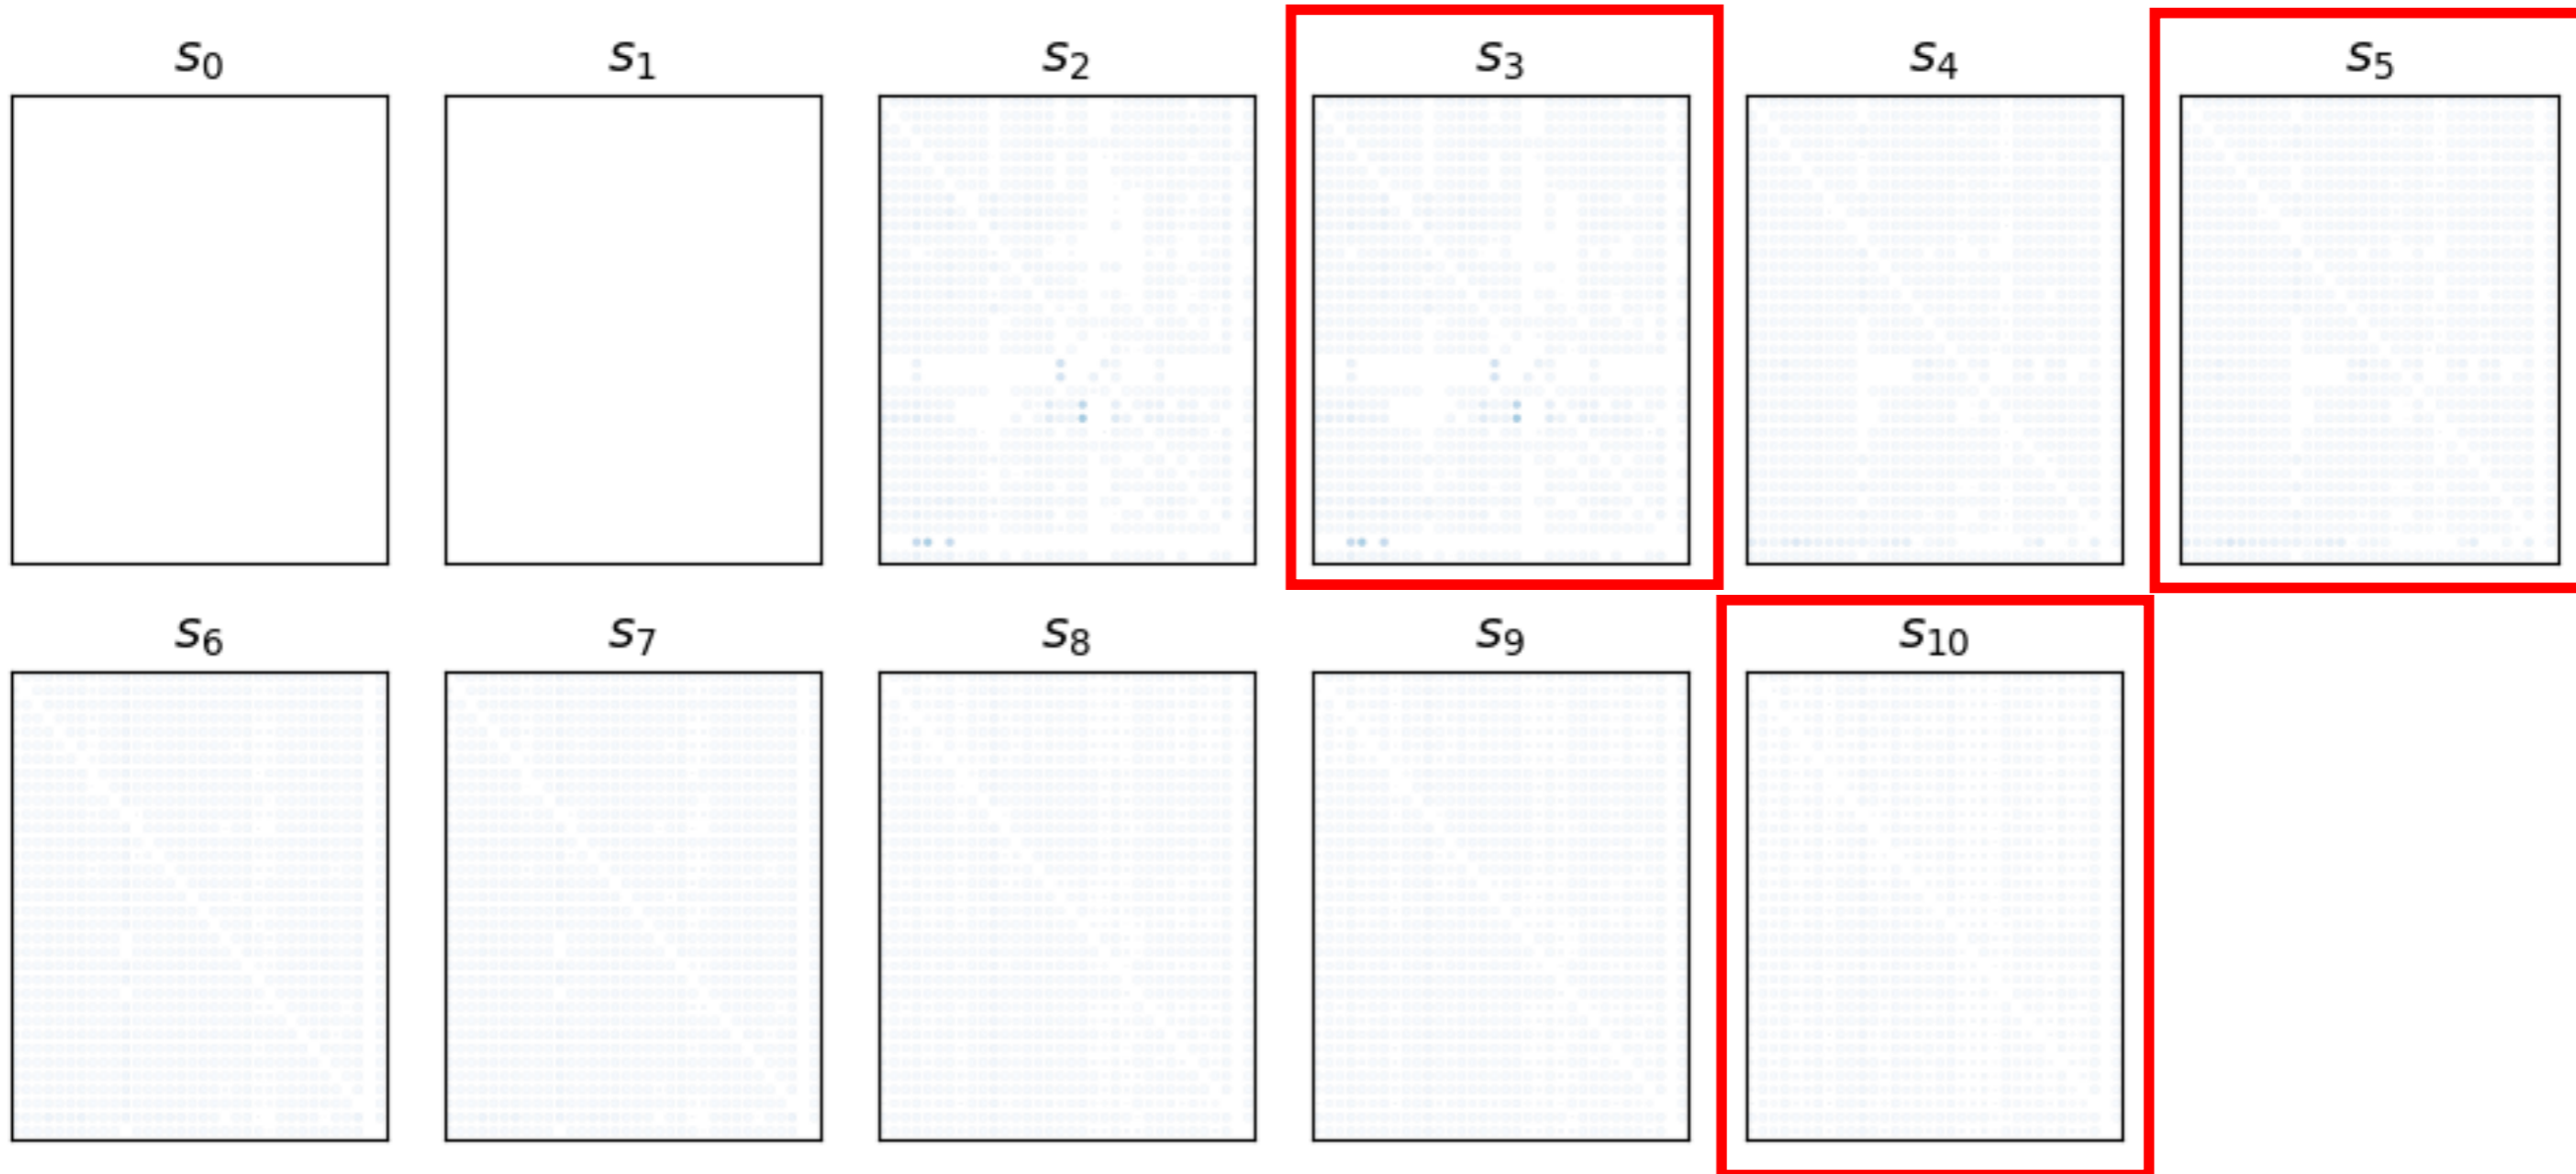

## Influence Score $s_3$

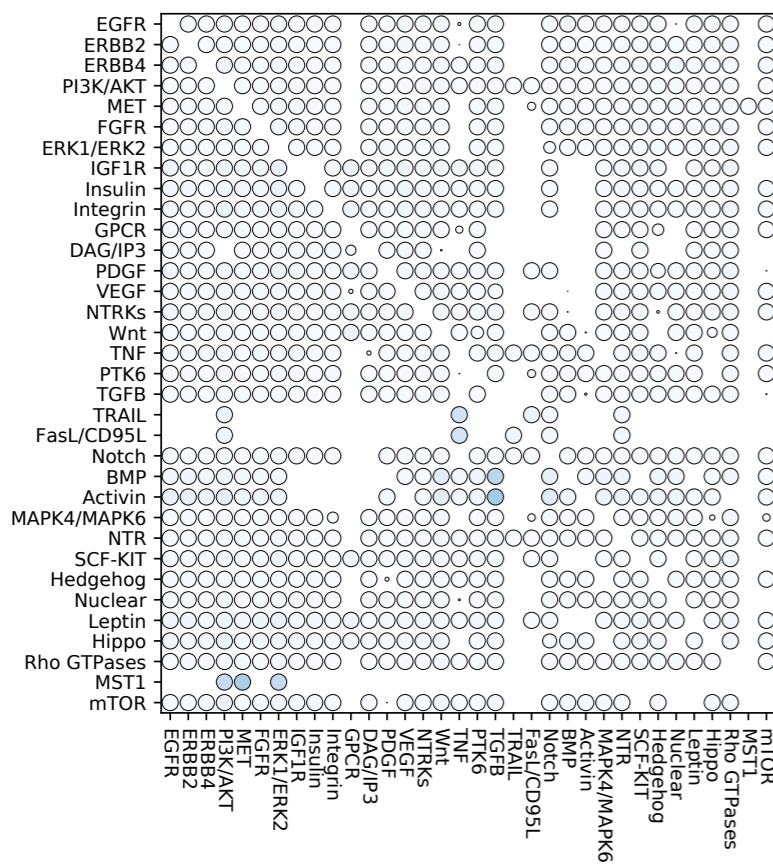

## Influence Score $s_5$

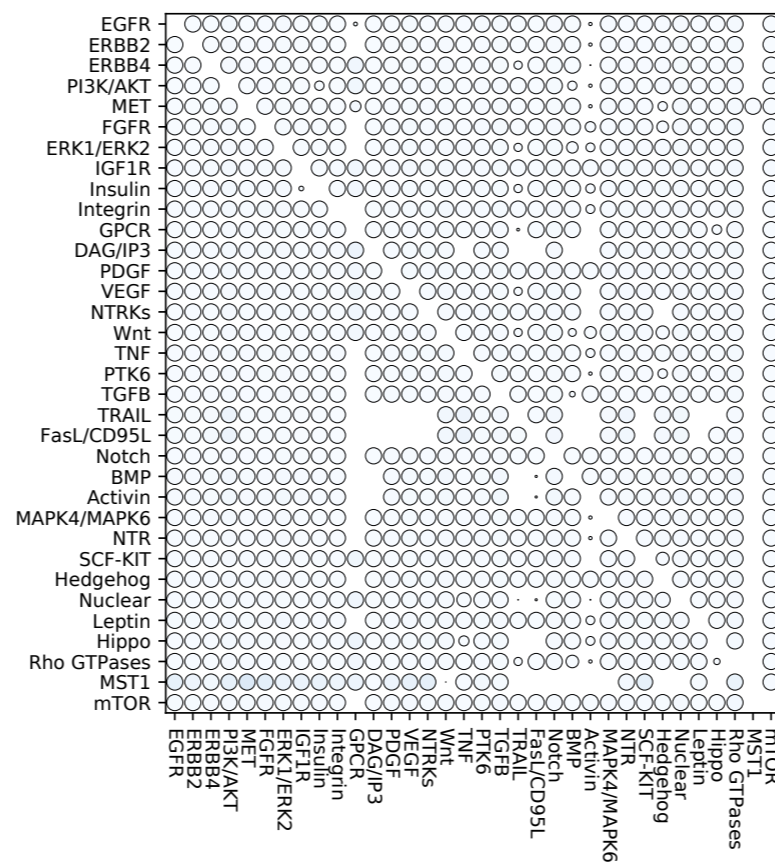

## Influence Score $s_{10}$

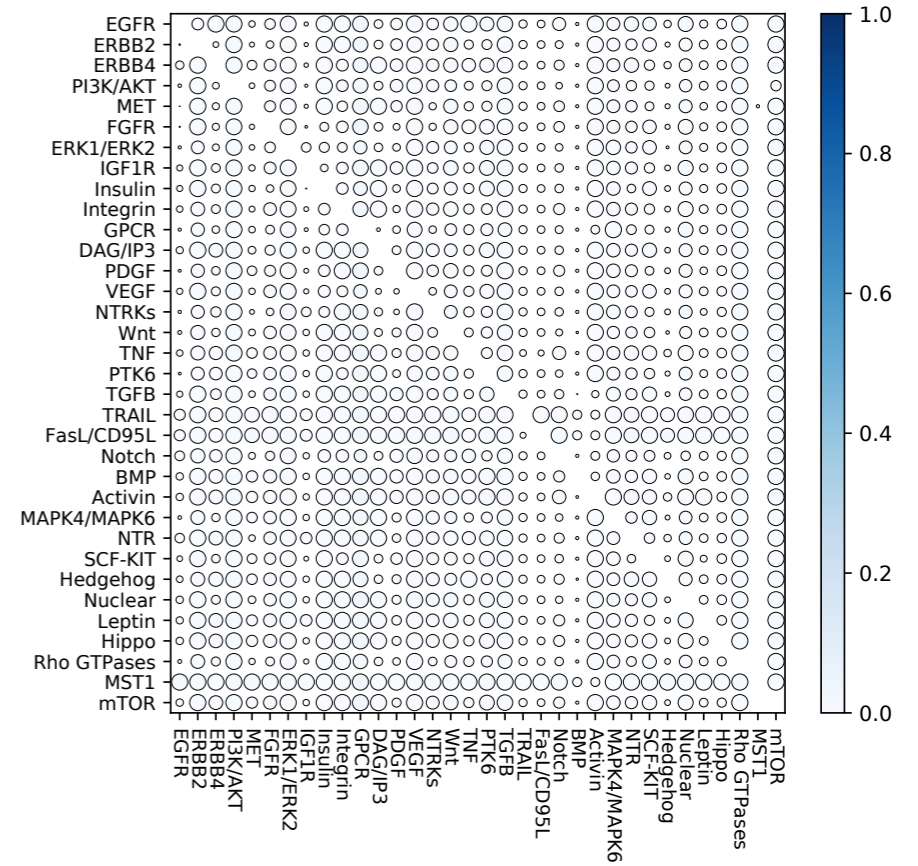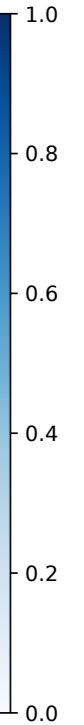

Supplement: pcbi.1007384.s004.pdf [file pcbi.1007384.s004.pdf]
