# Supplementary material for: Hypergraph-based connectivity measures for signaling pathway topologies
Source: PubMed Central journal article supplement (PMC6834280; doi:10.1371/journal.pcbi.1007384), 2019-10-25

# Bipartite Graph Influence Scores

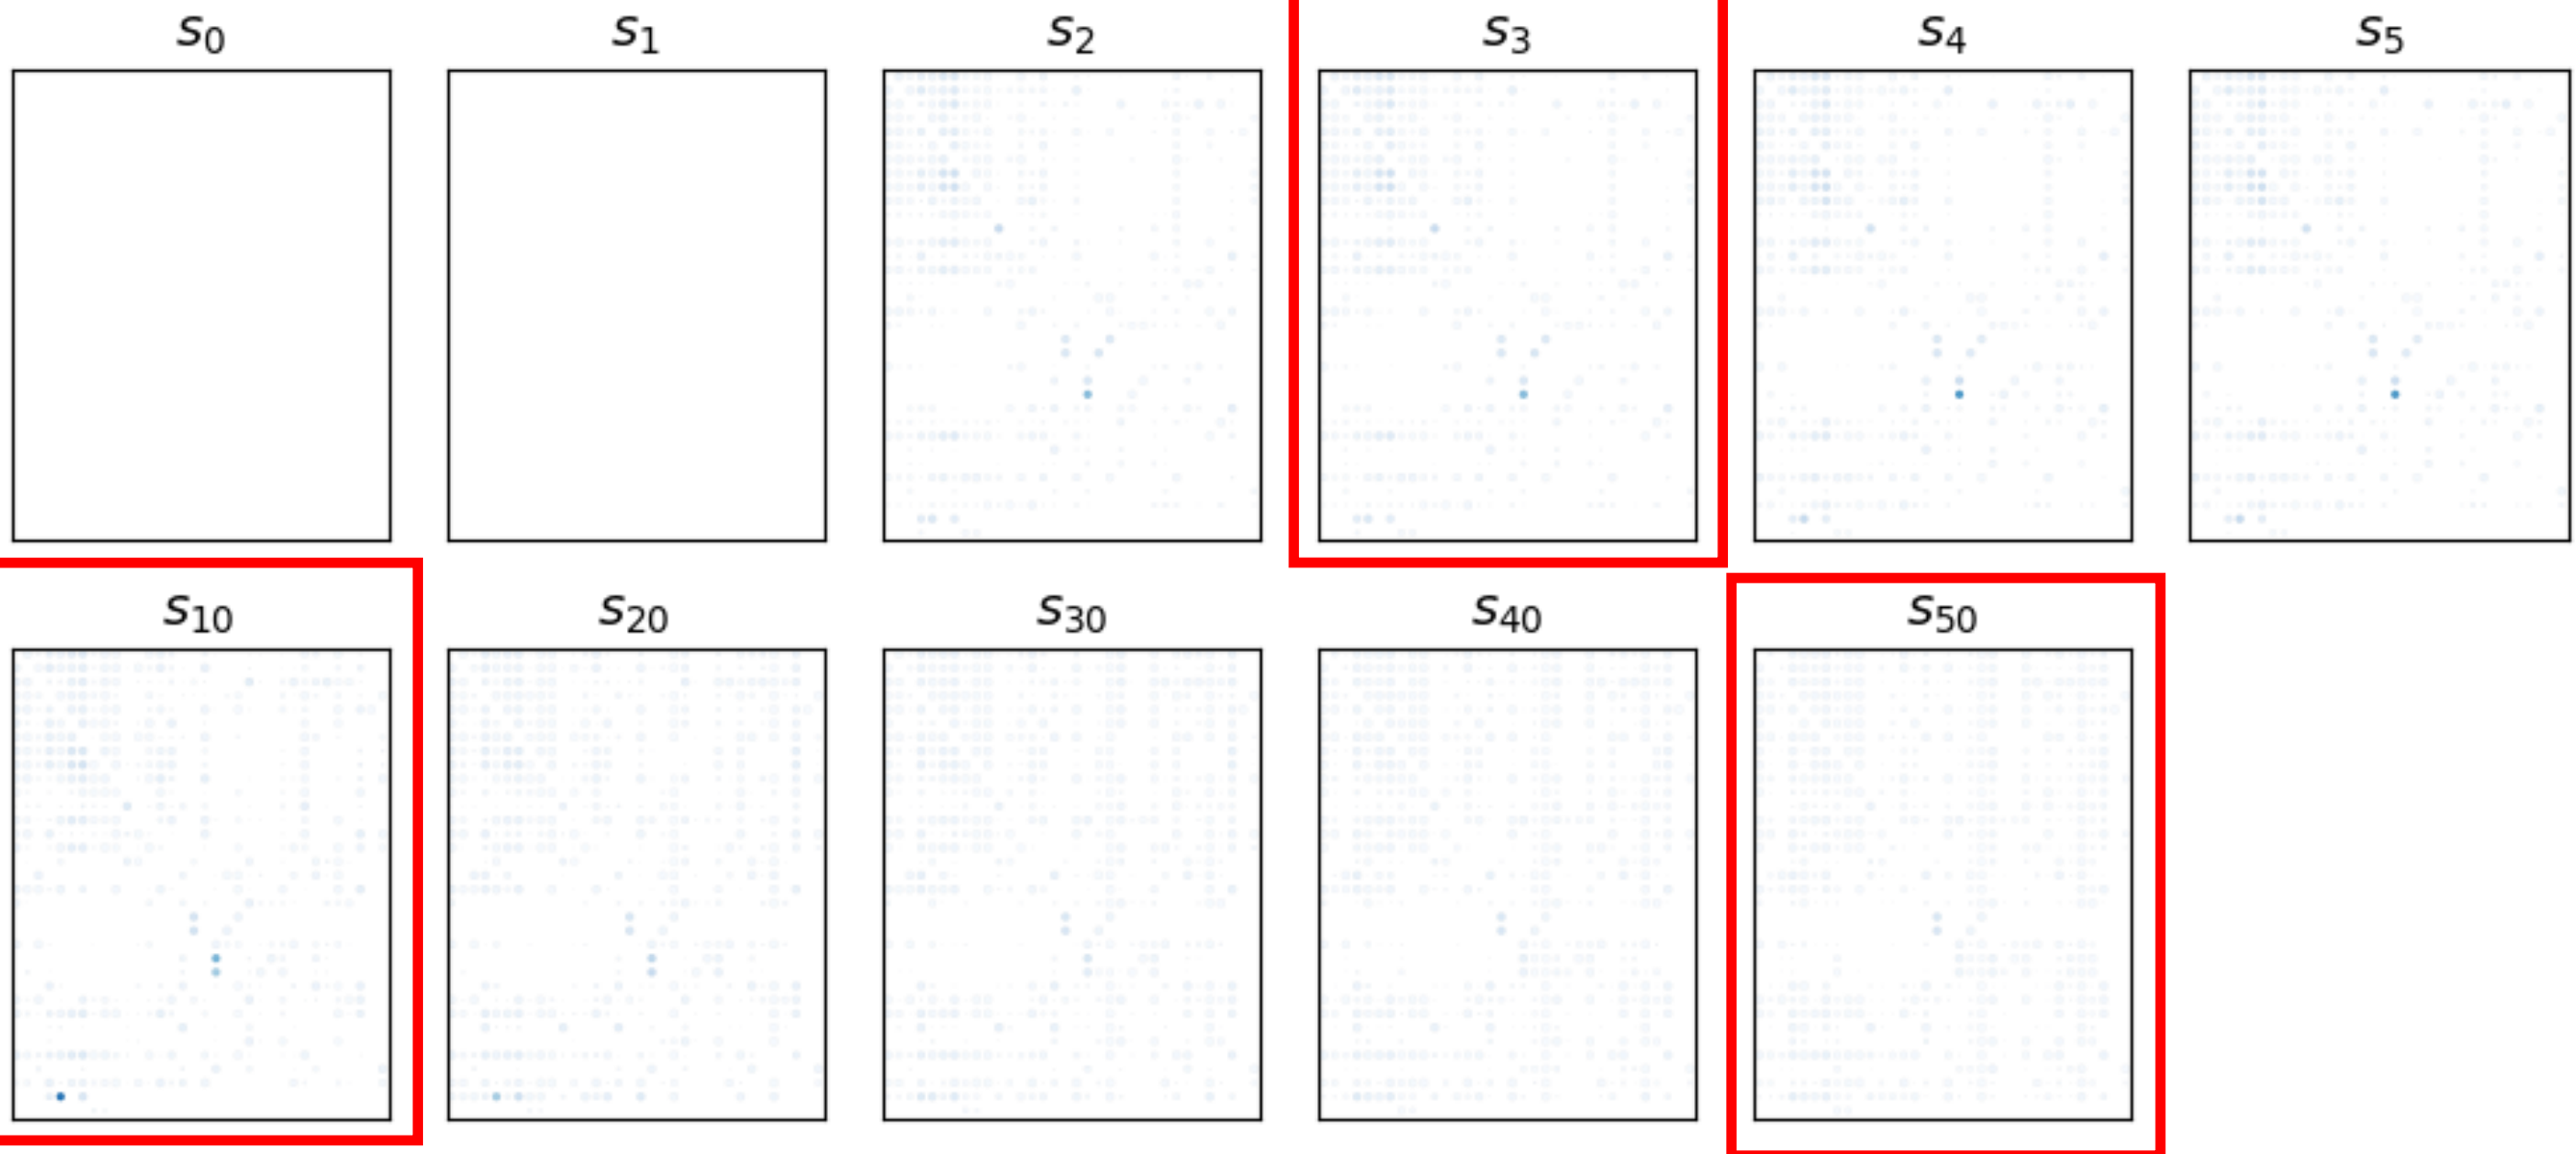

Influence Score  $s_3$

Influence Score  $s_{10}$

Influence Score  $s_{50}$

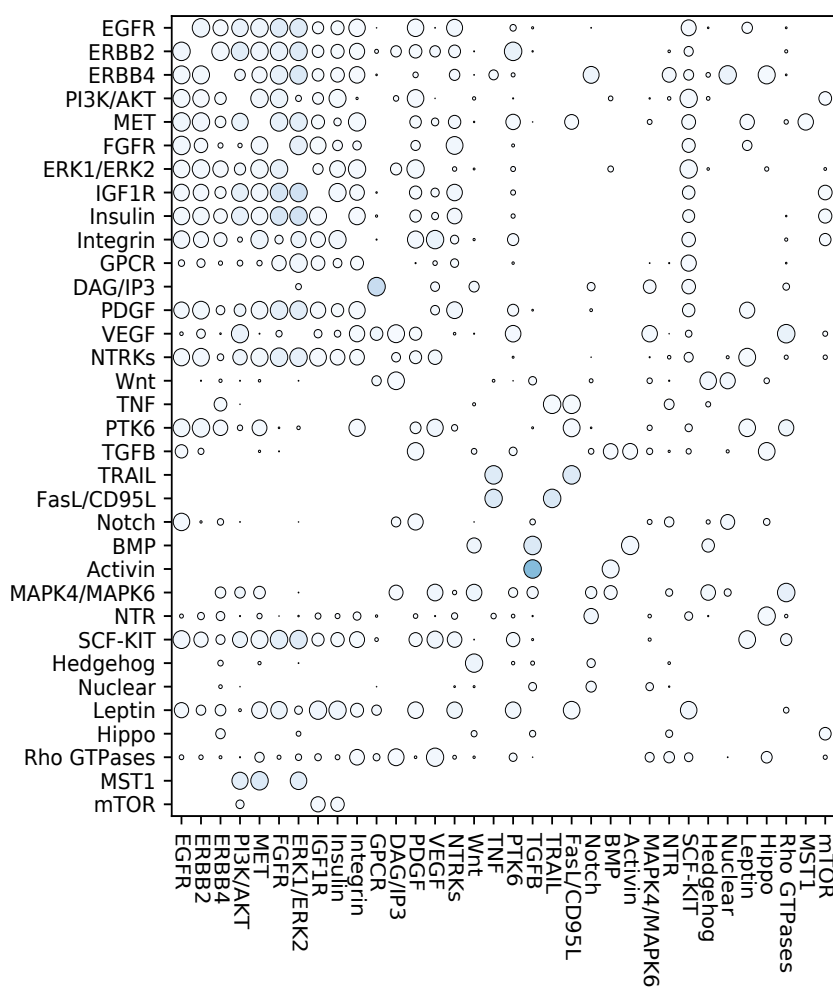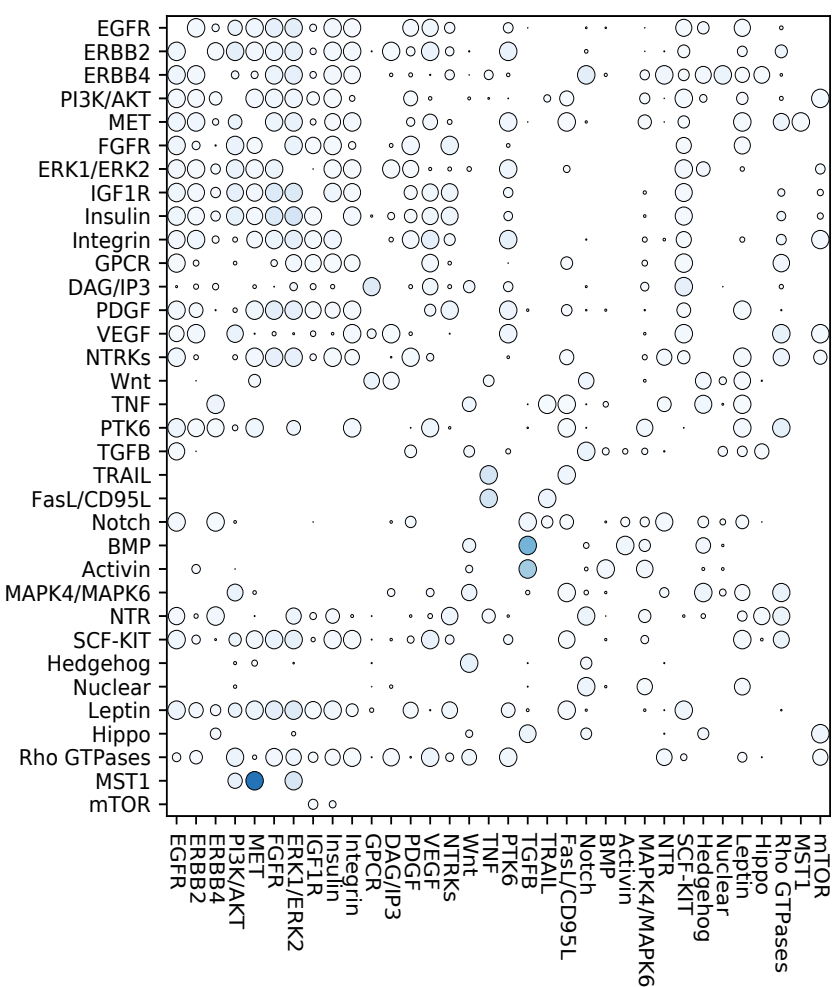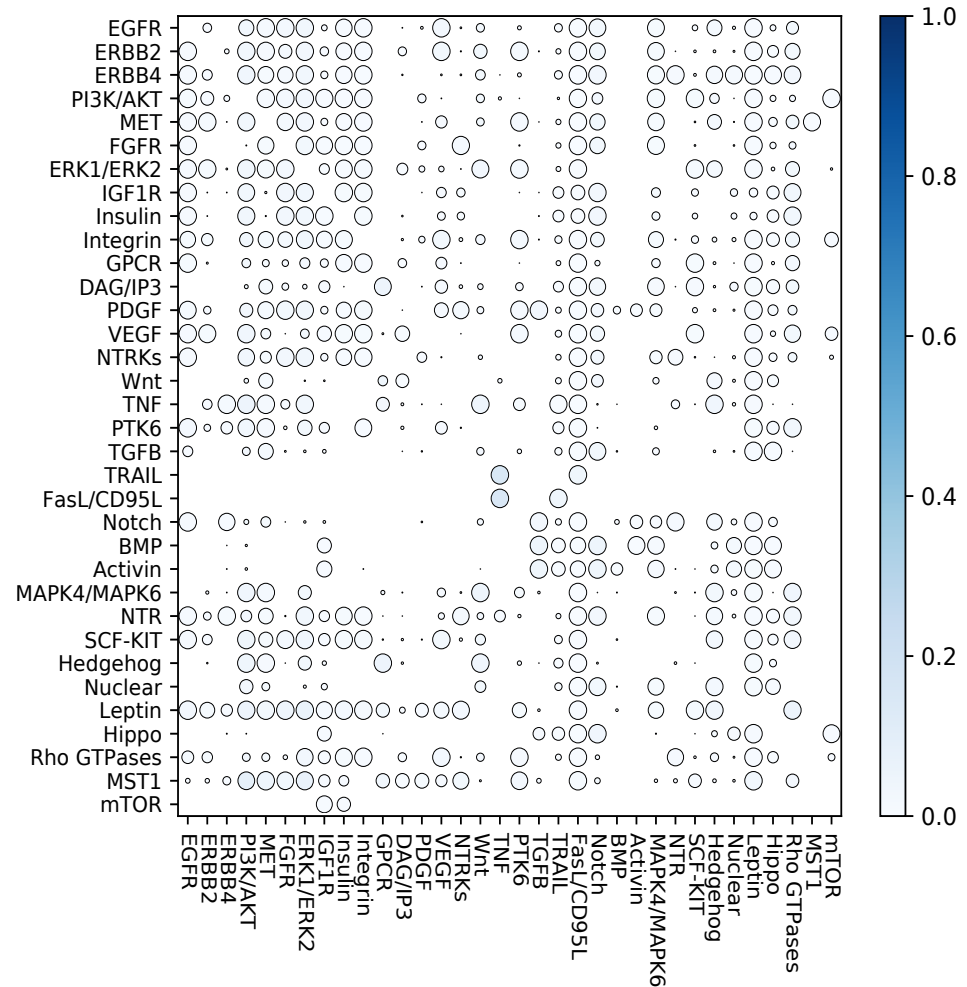

Supplement: pcbi.1007384.s005.pdf [file pcbi.1007384.s005.pdf]
