# Supplementary material for: Hypergraph-based connectivity measures for signaling pathway topologies
Source: PubMed Central journal article supplement (PMC6834280; doi:10.1371/journal.pcbi.1007384), 2019-10-25

**A**

Source Pathway MST1

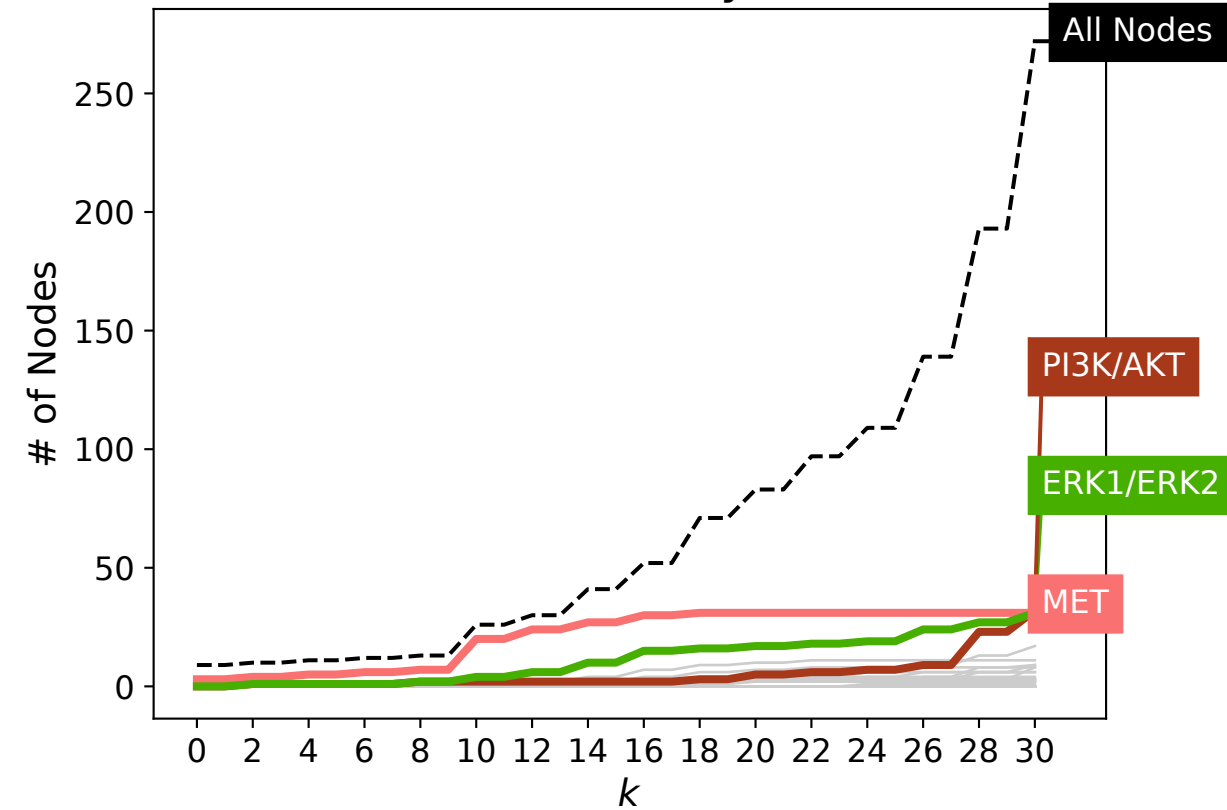**B**

Source Pathway Activin

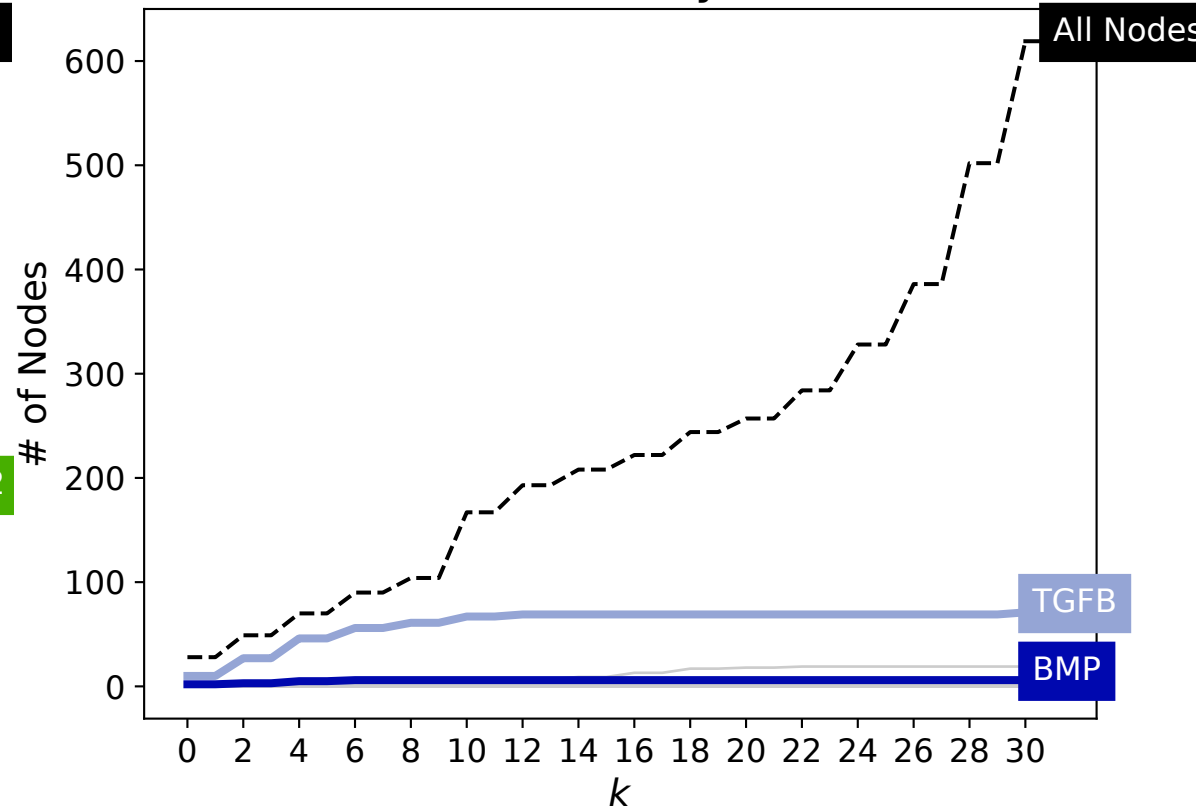**C**

Source Pathway BMP

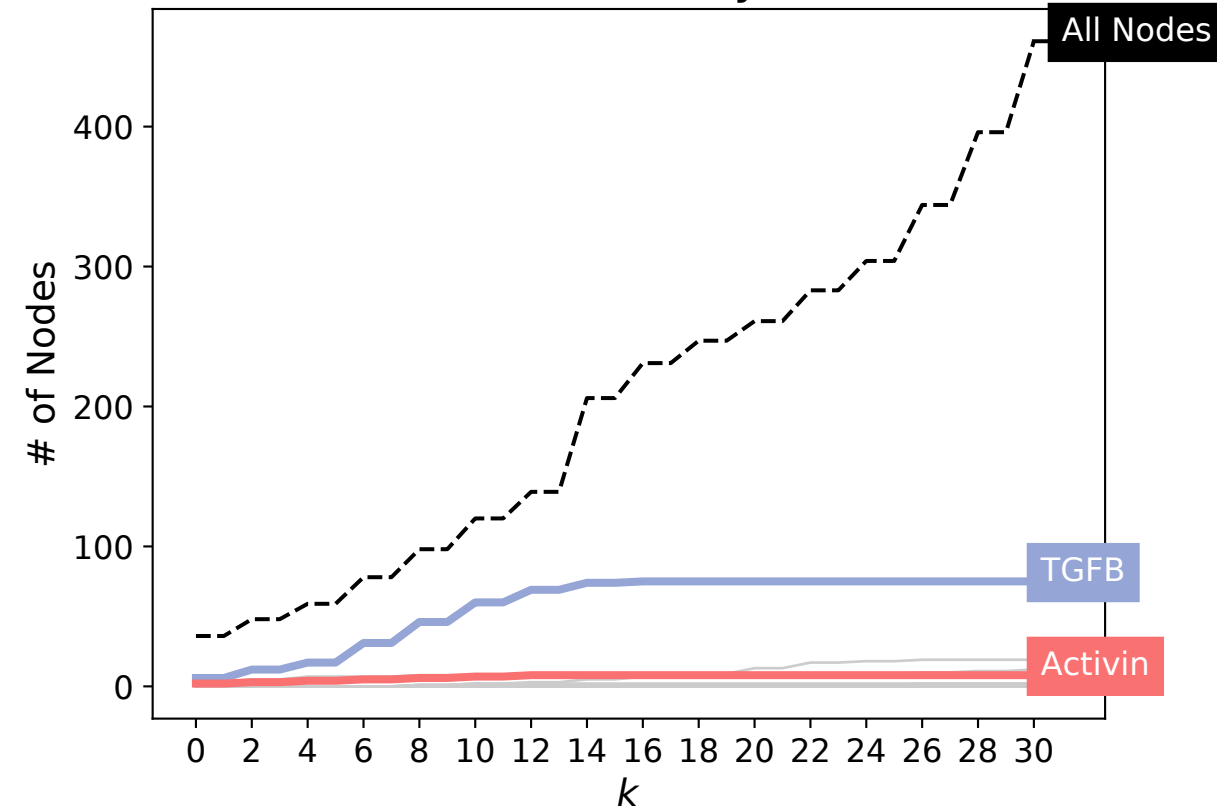

Supplement: pcbi.1007384.s006.pdf [file pcbi.1007384.s006.pdf]
