# Supplementary material for: Hypergraph-based connectivity measures for signaling pathway topologies
Source: PubMed Central journal article supplement (PMC6834280; doi:10.1371/journal.pcbi.1007384), 2019-10-25

## "Neighborhood" Channel

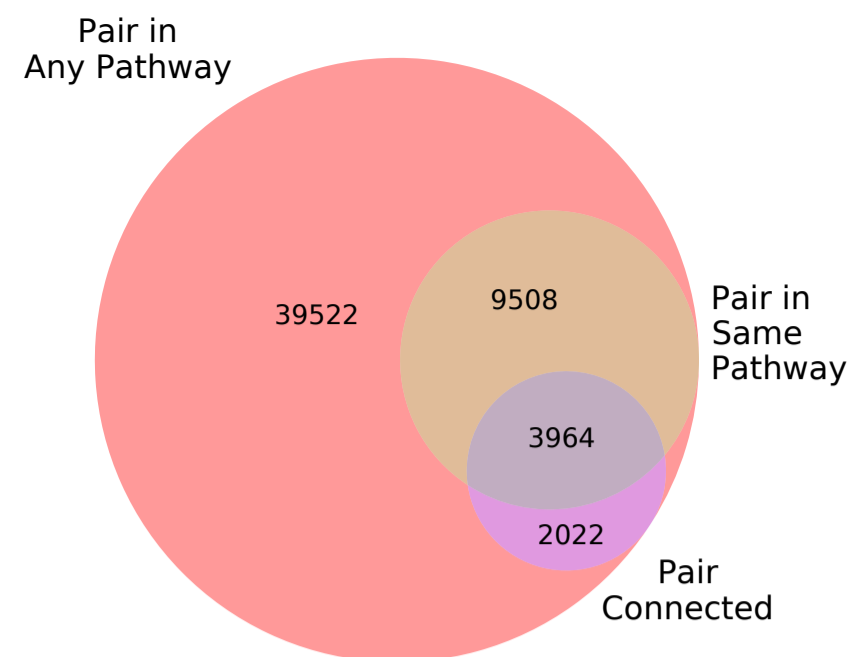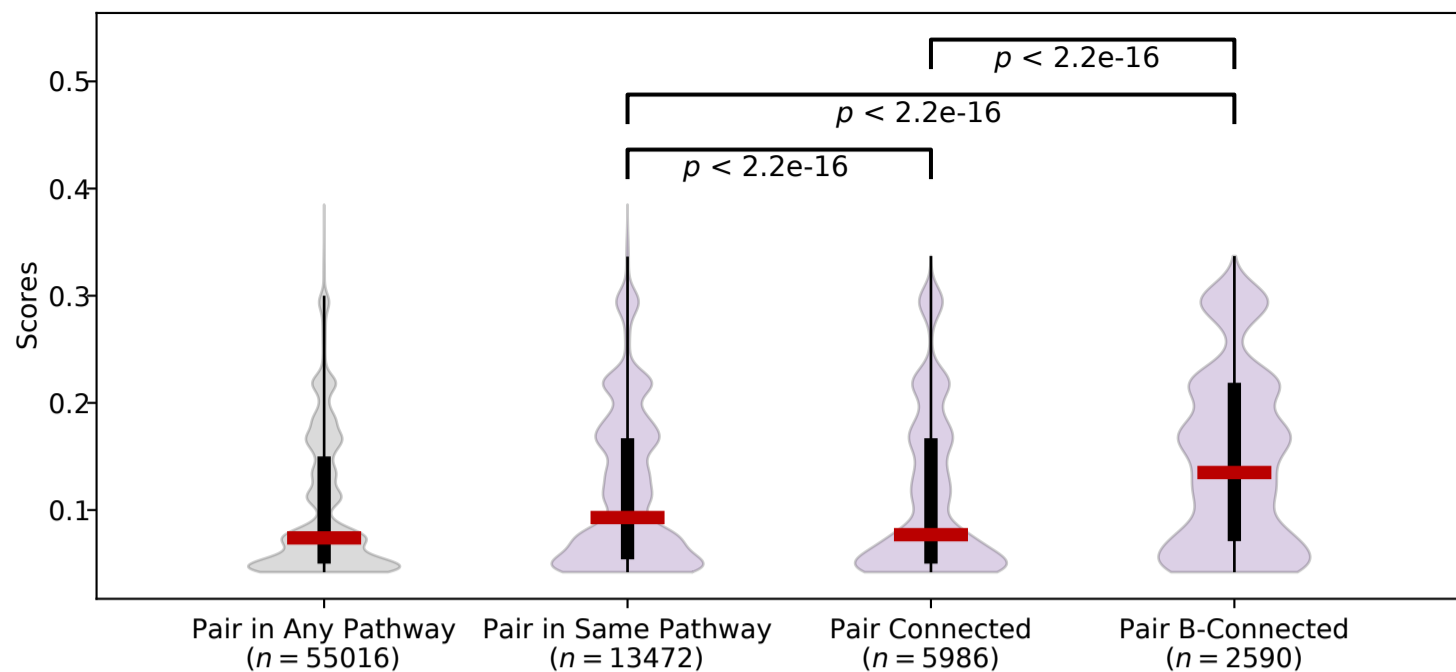

## "Coexpression" Channel

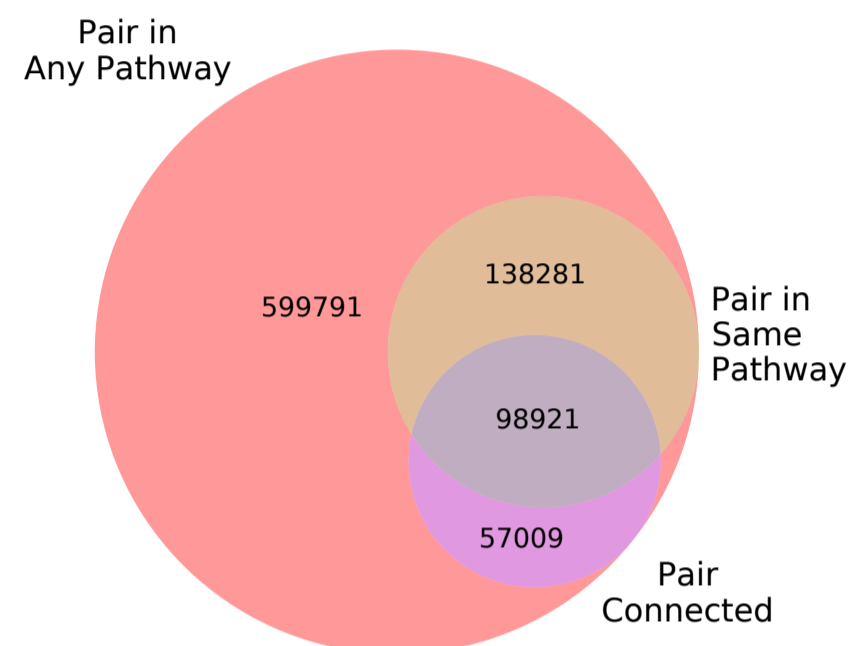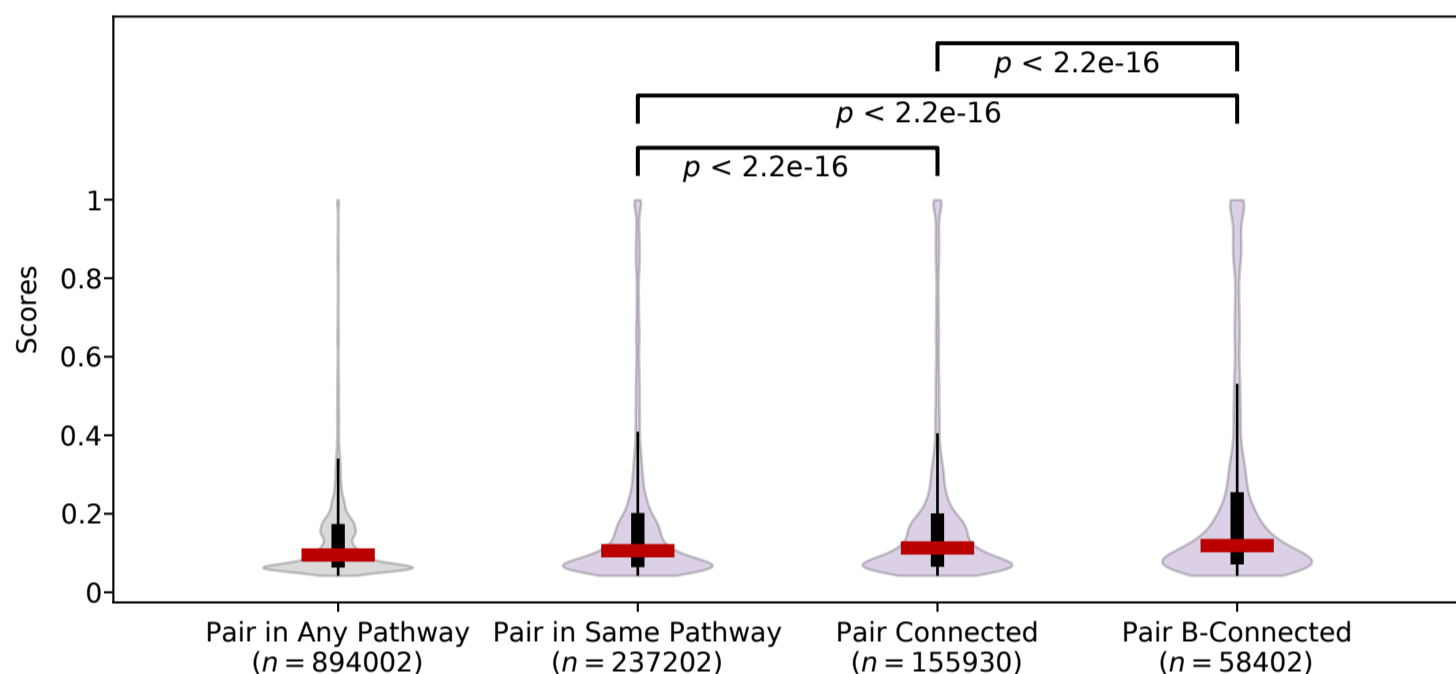

## "Co-occurrence" Channel

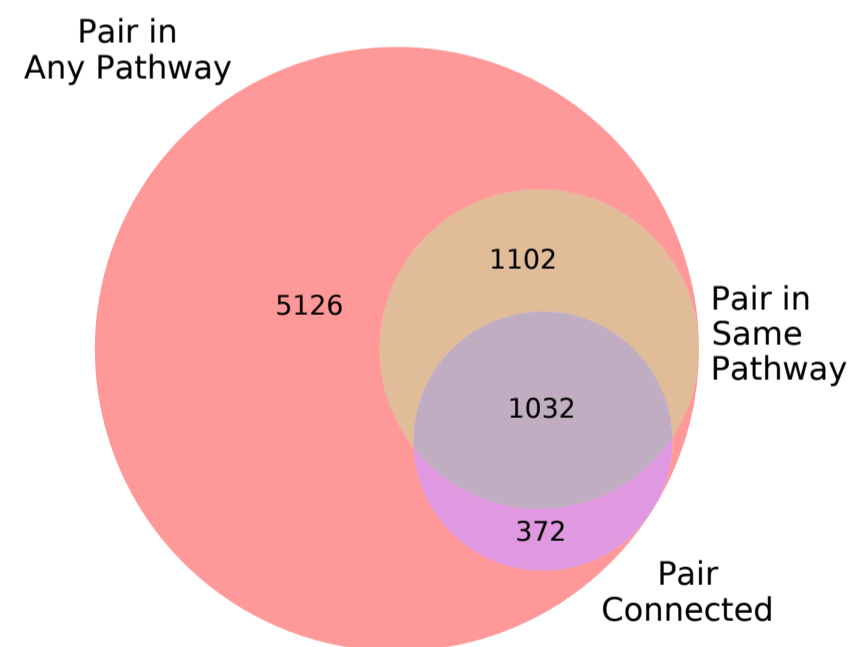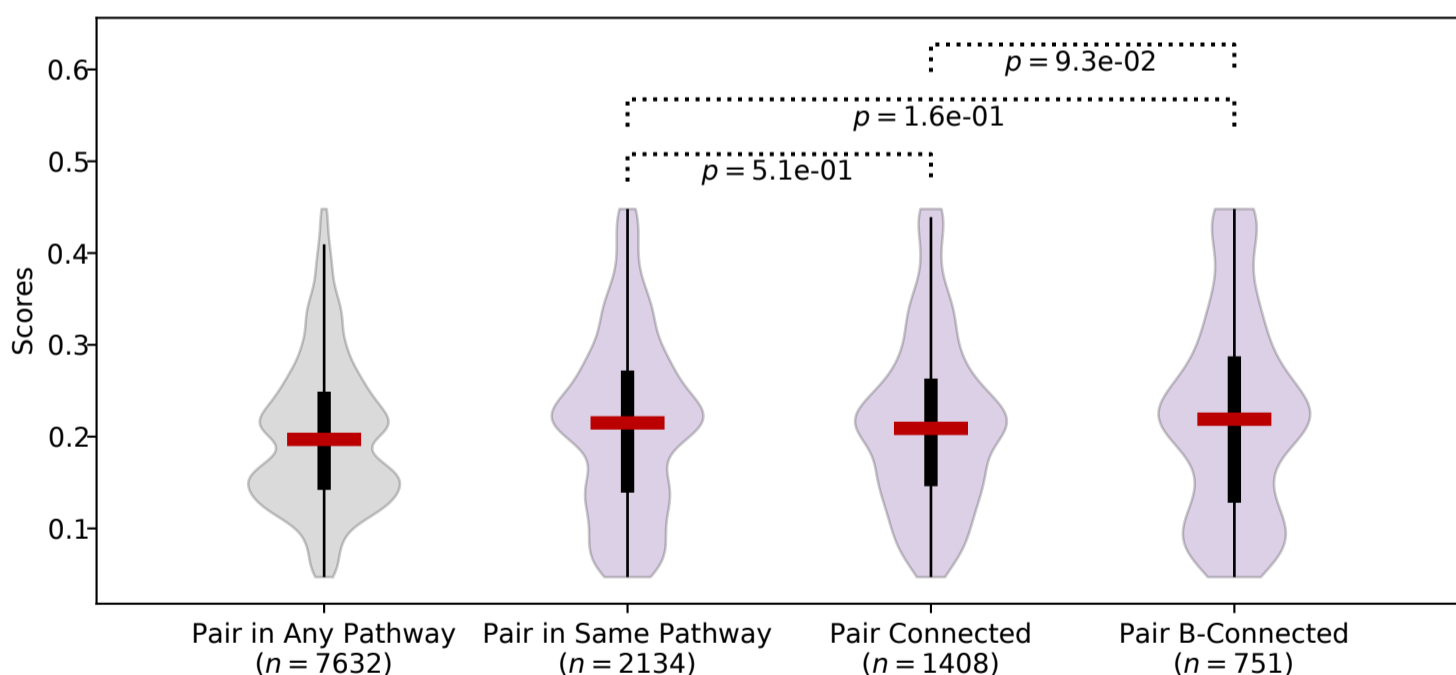

## "Fusion" Channel

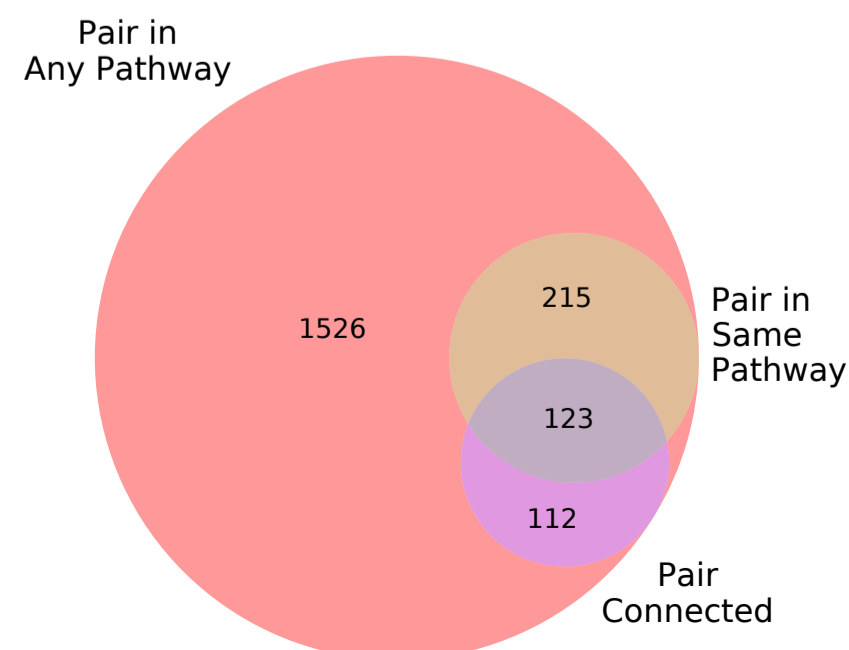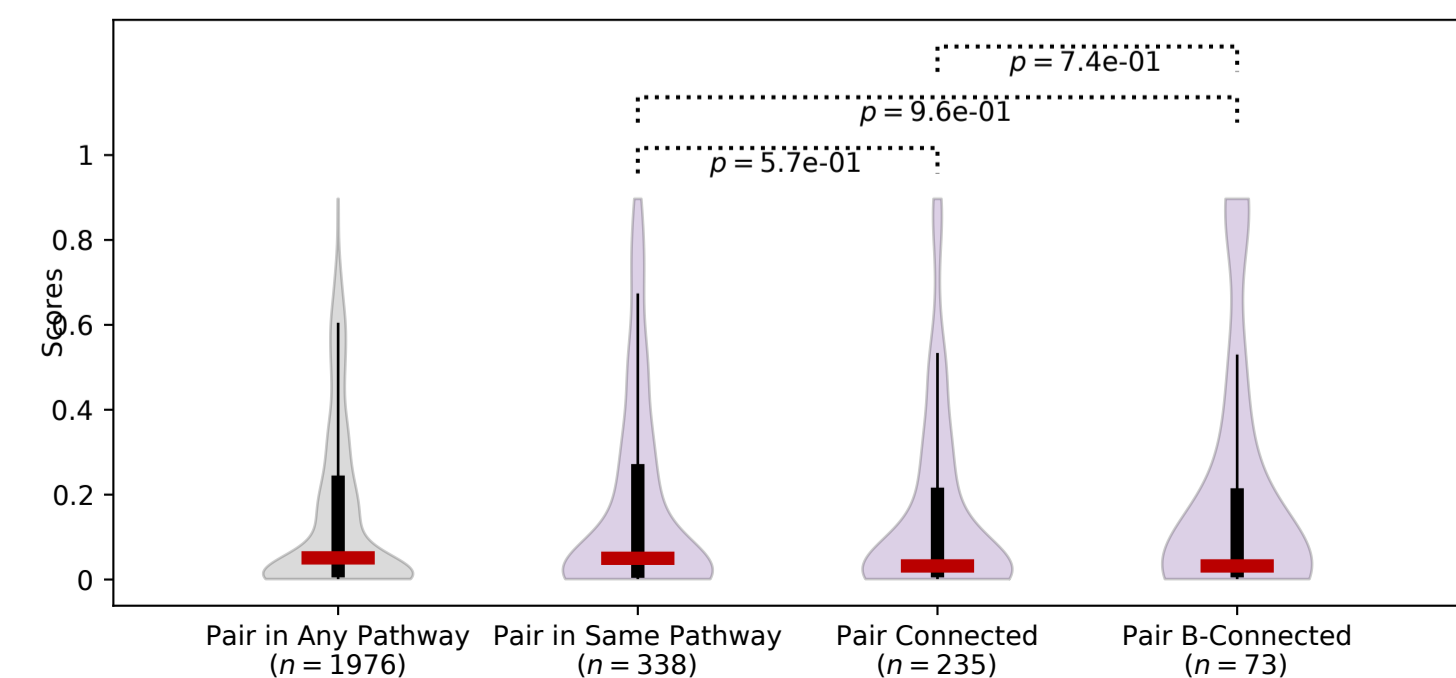

Supplement: pcbi.1007384.s009.pdf [file pcbi.1007384.s009.pdf]
