# Supplementary material for: Hypergraph-based connectivity measures for signaling pathway topologies
Source: PubMed Central journal article supplement (PMC6834280; doi:10.1371/journal.pcbi.1007384), 2019-10-25
Supplement: pcbi.1007384.s013.pdf [file pcbi.1007384.s013.pdf]

**S2 Table** – Hypergraph-based Connectivity Measures for Signaling Pathway Topologies

| Binary Relation                | # of Relations |                 |
|--------------------------------|----------------|-----------------|
|                                | in Reactome    | Conversion Rule |
| catalysis-precedes             | 263,342        | Directed Edge   |
| chemical-affects               | 15,473         | Directed Edge   |
| consumption-controlled-by      | 8,079          | Directed Edge   |
| controls-expression-of         | 3,730          | Directed Edge   |
| controls-phosphorylation-of    | 3,184          | Directed Edge   |
| controls-production-of         | 8,052          | Directed Edge   |
| controls-state-change-of       | 113,558        | Directed Edge   |
| controls-transport-of          | 5,232          | Directed Edge   |
| controls-transport-of-chemical | 5,105          | Directed Edge   |
| in-complex-with                | 140,302        | Undirected Edge |
| reacts-with                    | 1,922          | Undirected Edge |
| used-to-produce                | 5,888          | Directed Edge   |

**Rules for converting SIF binary relations to directed edges.** We ignore the “neighbor-of” binary relation.
